# Supplementary material
Source: Springer Nature journal article supplement (https://www.springermedizin.de/resource/supplementary/12955_2013_1107_MOESM2_ESM.pdf/9559288)

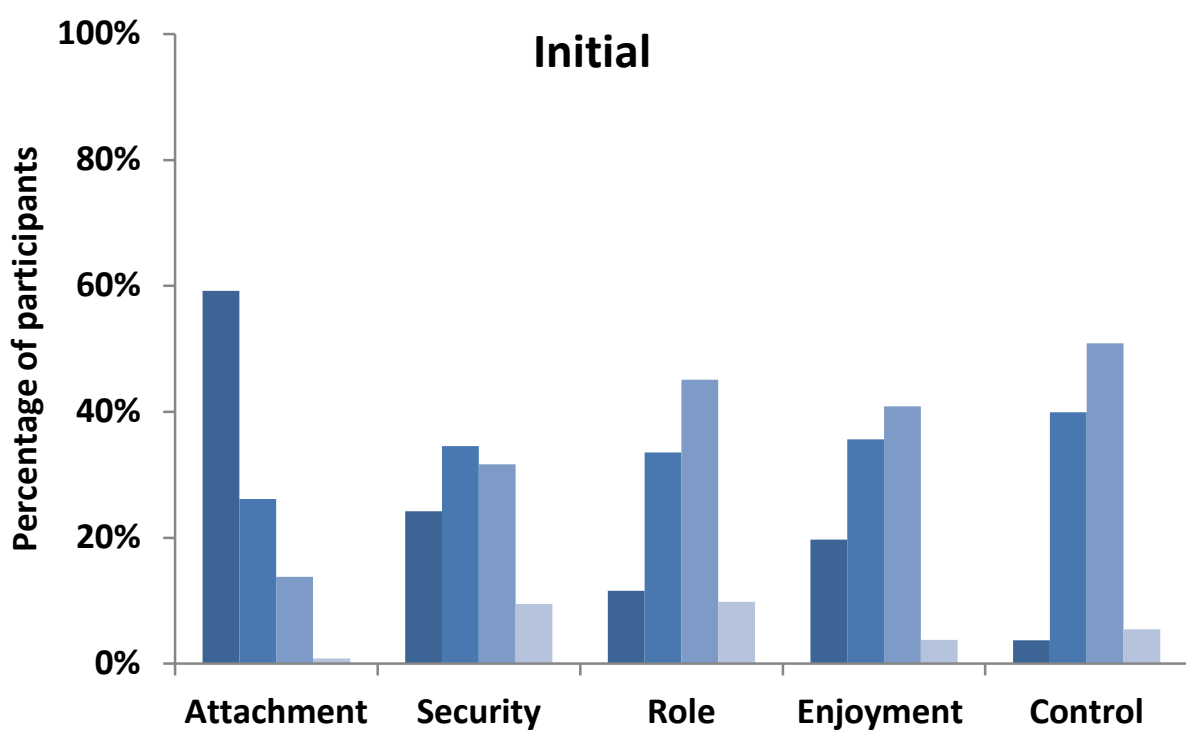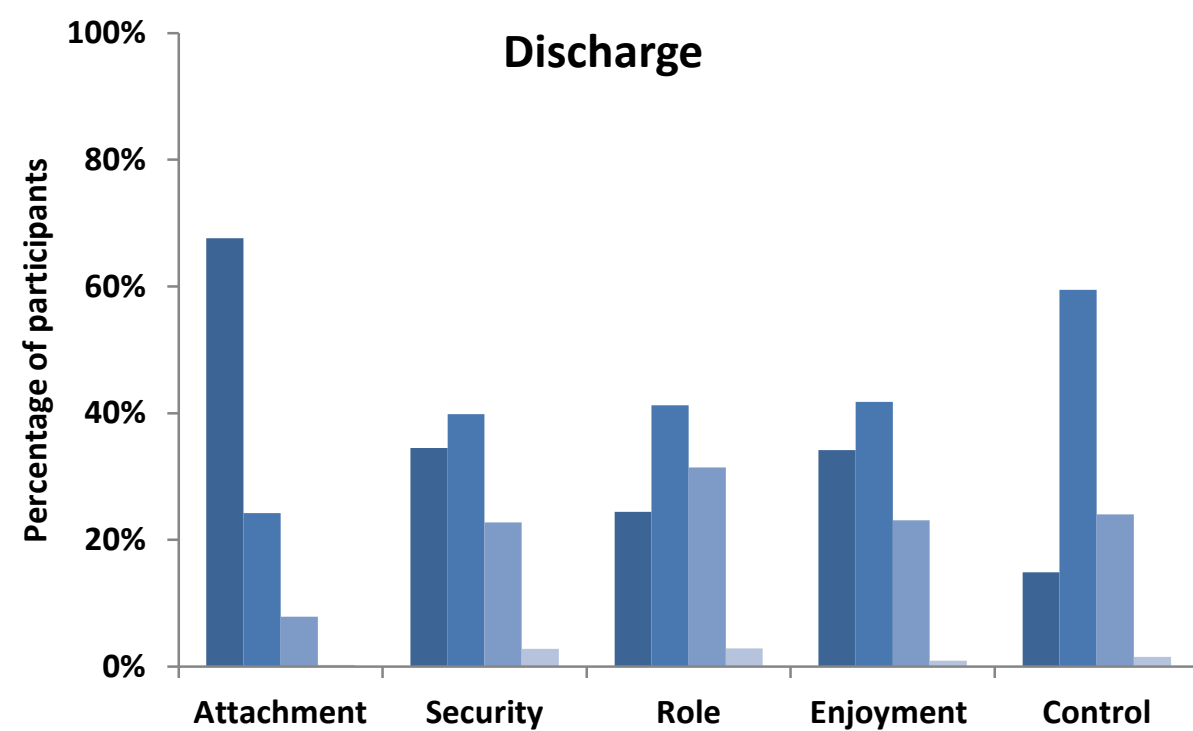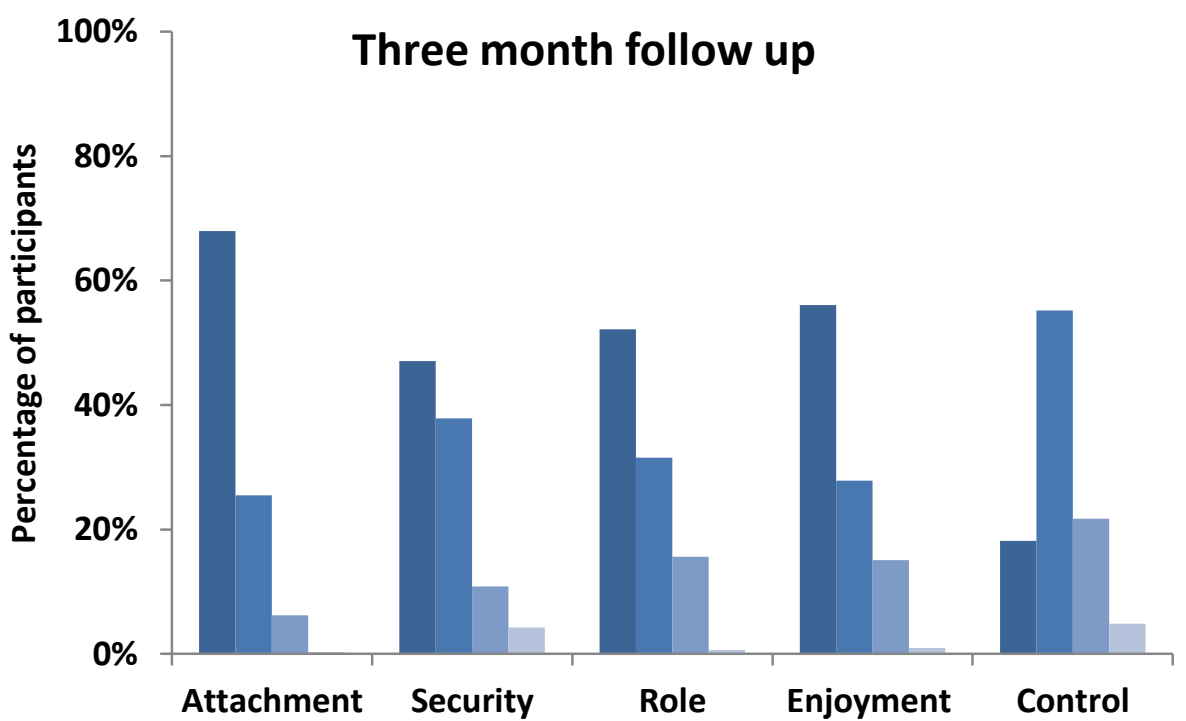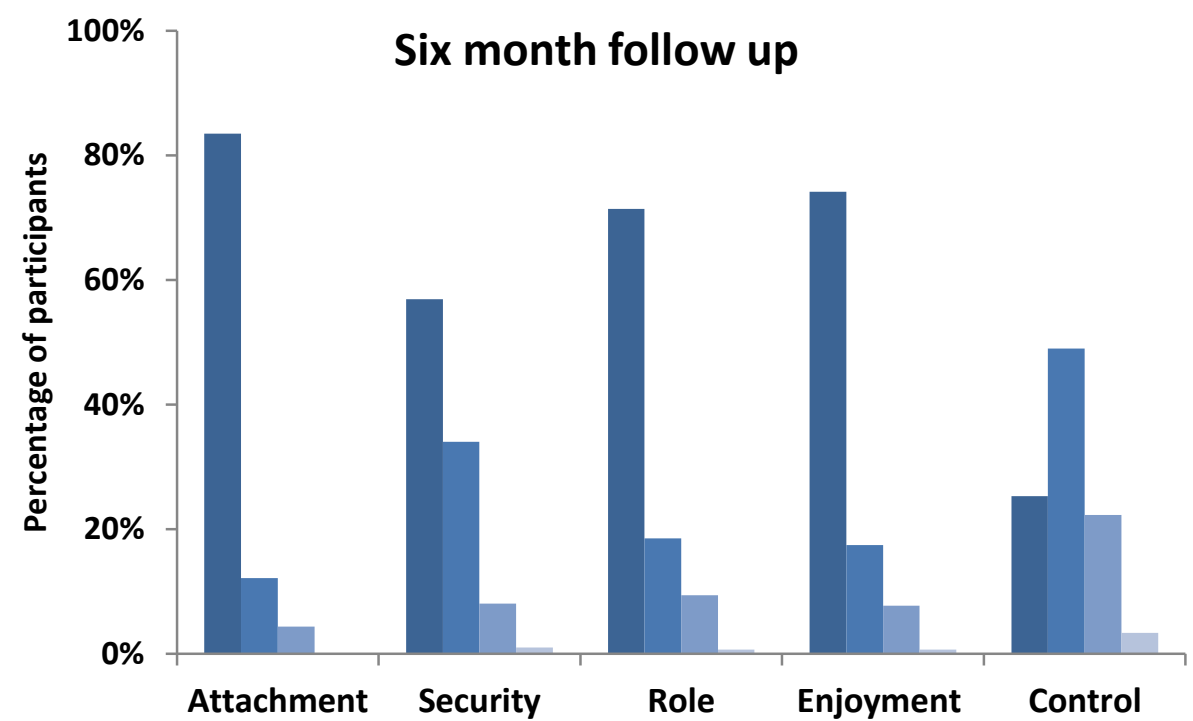

■ All 
 ■ A lot/many 
 ■ A little/few 
 ■ Unable

Supplement: MOESM2 [file 9559288]
